# Supplementary material for: The Vacuolar Zinc Transporter TgZnT Protects Toxoplasma gondii from Zinc Toxicity
Source: PubMed Central journal article supplement (PMC6531880; doi:10.1128/msphere.00086-19), 2019-05-22

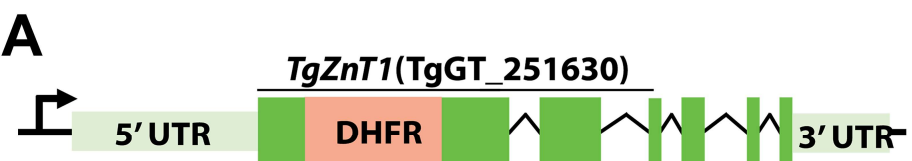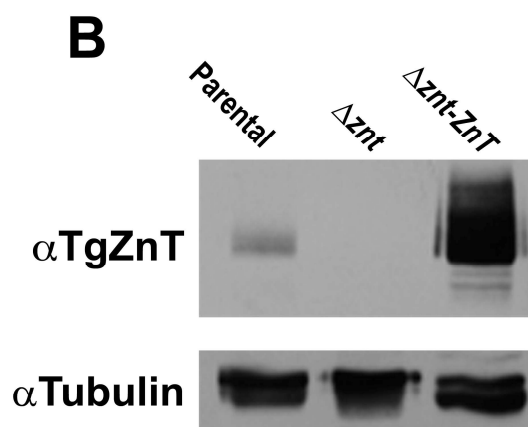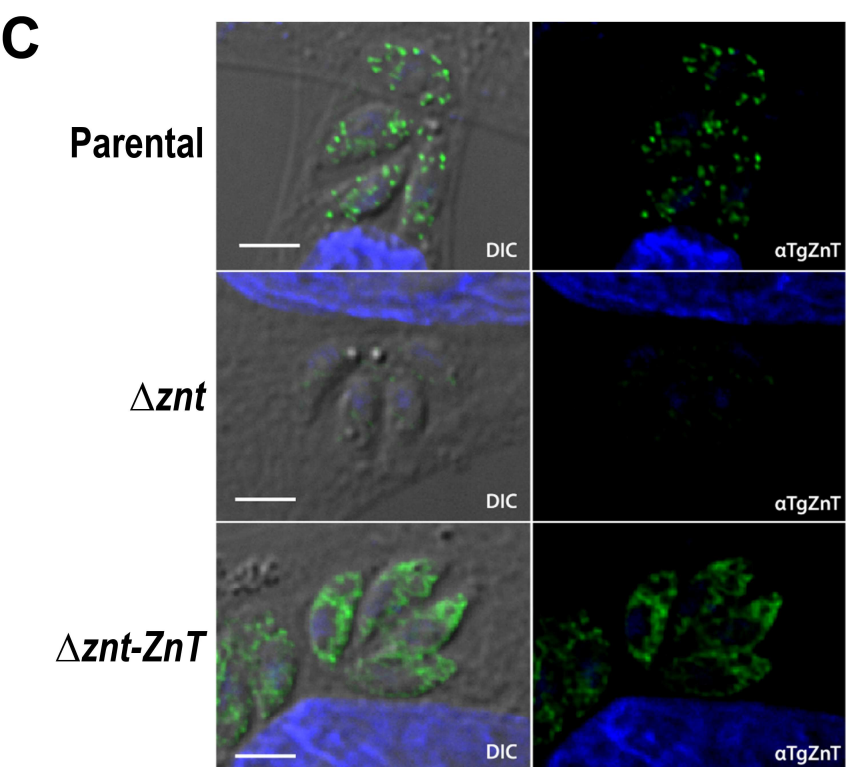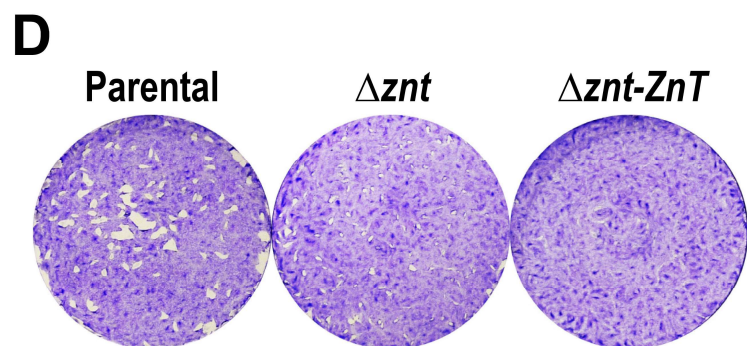

Supplement: mSphere.00086-19-sf002.pdf [file mSphere.00086-19-sf002.pdf]
