# Supplementary material for: The Vacuolar Zinc Transporter TgZnT Protects Toxoplasma gondii from Zinc Toxicity
Source: PubMed Central journal article supplement (PMC6531880; doi:10.1128/msphere.00086-19), 2019-05-22
Supplement: mSphere.00086-19-st001.pdf [file mSphere.00086-19-st001.pdf]

**Table S1 Amino Acid Sequences Used for Alignments and Tree Generation**

| <b>Organism, Protein Name</b>             | <b>UniProtID</b> | <b>EuPathDB ID</b> |
|-------------------------------------------|------------------|--------------------|
| <i>Toxoplasma gondii</i> GT1, TgZnT       | S7V0D3           | TGGT1_251630       |
| <i>Neospora caninum</i> , NcZnT           | F0VR98           | NCLIV_066710       |
| <i>Eimeria tenella</i> , EtZnT            | U6L3J7           | ETH_00033120       |
| <i>Plasmodium falciparum</i> , PfZnT      | Q8IBU1           | PF3D7_0715900      |
| <i>Cryptosporidium parvum</i> , CpZnT     | Q5CSE6           | cgd1_3050          |
| <i>Arabidopsis thaliana</i> , AtMTP1      | Q9ZT63           |                    |
| <i>Arabidopsis thaliana</i> , AtMTP3      | Q9LXS1           |                    |
| <i>Oryza sativa</i> , OsMTP1              | Q688R1           |                    |
| <i>Mus musculus</i> , MmZnT1              | Q60738           |                    |
| <i>Mus musculus</i> , MmZnT2              | Q2HJ10           |                    |
| <i>Mus musculus</i> , MmZnT5              | Q8R4H9           |                    |
| <i>Mus musculus</i> , MmZnT9              | Q5IRJ6           |                    |
| <i>Homo sapiens</i> , HsZnT6              | Q6NXT4           |                    |
| <i>Bacillus subtilis</i> , BsCzC          | O07084           |                    |
| <i>Saccharomyces cerevisiae</i> , ScZRC1  | P20107           |                    |
| <i>Saccharomyces cerevisiae</i> , ScCOT1  | P32798           |                    |
| <i>Saccharomyces cerevisiae</i> , ScMMT1  | Q03218           |                    |
| <i>Saccharomyces cerevisiae</i> , ScMMT2  | Q08970           |                    |
| <i>Saccharomyces cerevisiae</i> , ScMsc2  | Q03455           |                    |
| <i>Saccharomyces cerevisiae</i> , ScZrg17 | P53735           |                    |
| <i>Stylosanthes hamata</i> , ScMTP1       | Q84ND6           |                    |
| <i>Escherichia coli</i> , EcZitB          | P75757           |                    |
| <i>Escherichia coli</i> , EcYiiP          | P69380           |                    |
| <i>Wautersia metallidurans</i> , WmFieF   | Q1LHU8           |                    |
