# Supplementary material for: The Vacuolar Zinc Transporter TgZnT Protects Toxoplasma gondii from Zinc Toxicity
Source: PubMed Central journal article supplement (PMC6531880; doi:10.1128/msphere.00086-19), 2019-05-22
Supplement: mSphere.00086-19-st002.pdf [file mSphere.00086-19-st002.pdf]

**Table S2: Primers Used for TgZnT Work**

| <b>N°</b> | <b>Primer</b>                                                        |
|-----------|----------------------------------------------------------------------|
| 1         | 5'_tacttccaatccaatTTaatGCCTTCTCTCTCGTCGATGTTCACTGGGGAATG_3'          |
| 2         | 5'_tcctccacttccaatTTtagcGCGGCGGAAAACTTTCATGGG_3'                     |
| 3         | 5'_ACTGGGCTATCGCCGACCCAATTTG_3'                                      |
| 4         | 5'_AAGTTAGGAAGGCGTTTCCCCGTCCG_3'                                     |
| 5         | 5'_AAAACGGACGGGGAAAACGCCTTCCTA_3'                                    |
| 6         | 5'_ctcgagTATGCCAACAGTATTCAAGAAAACGAGGGC_3'                           |
| 7         | 5'_TTCGCTTCCTCTGCTCTGCGTTCGCTGCCTcagcacgaaaccttgattcaaac_3'          |
| 8         | 5'_CCGCCGCGCTTCTTGGAACGCGGCATGGCGggttgaagacagacgaaagcagttg_3'        |
| 9         | 5'_ggatcctCCGCCCTCAGCGTTCT_3'                                        |
| 10        | 5'_GTCGACCTCGGGAAAGGA_3'                                             |
| 11        | 5'_tcctttcccaggtcgacGTCGACGGCGAACTGATGTTTC_3'                        |
| 12        | 5'_ctcgagCTACTCGAGACGGACGTAGATGTC_3'                                 |
| 13        | 5'_tgaagacgcgGTTTTAGAGCTAGAAATAGC_3'                                 |
| 14        | 5'_gctctgcctAACTTGACATCCCCATTTAC_3'                                  |
| 15        | 5'_TTGCTCTTTTCGCTTCCTCTGCTCTGCGTTCGCTGaaactacgtggacattaagttccattc_3' |
| 16        | 5'_GCGGCTTGCTGCGCCCGCGCTTCTTGGAACGCGGCATggttgaagacagacgaaagcag_3'    |
